# Supplementary material for: A biopsychosocial approach assessing pain indicators among Black men
Source: Frontiers journal article supplement (doi:10.3389/fpain.2023.1060960), 2023-02-13

## CONSORT Flow Diagram

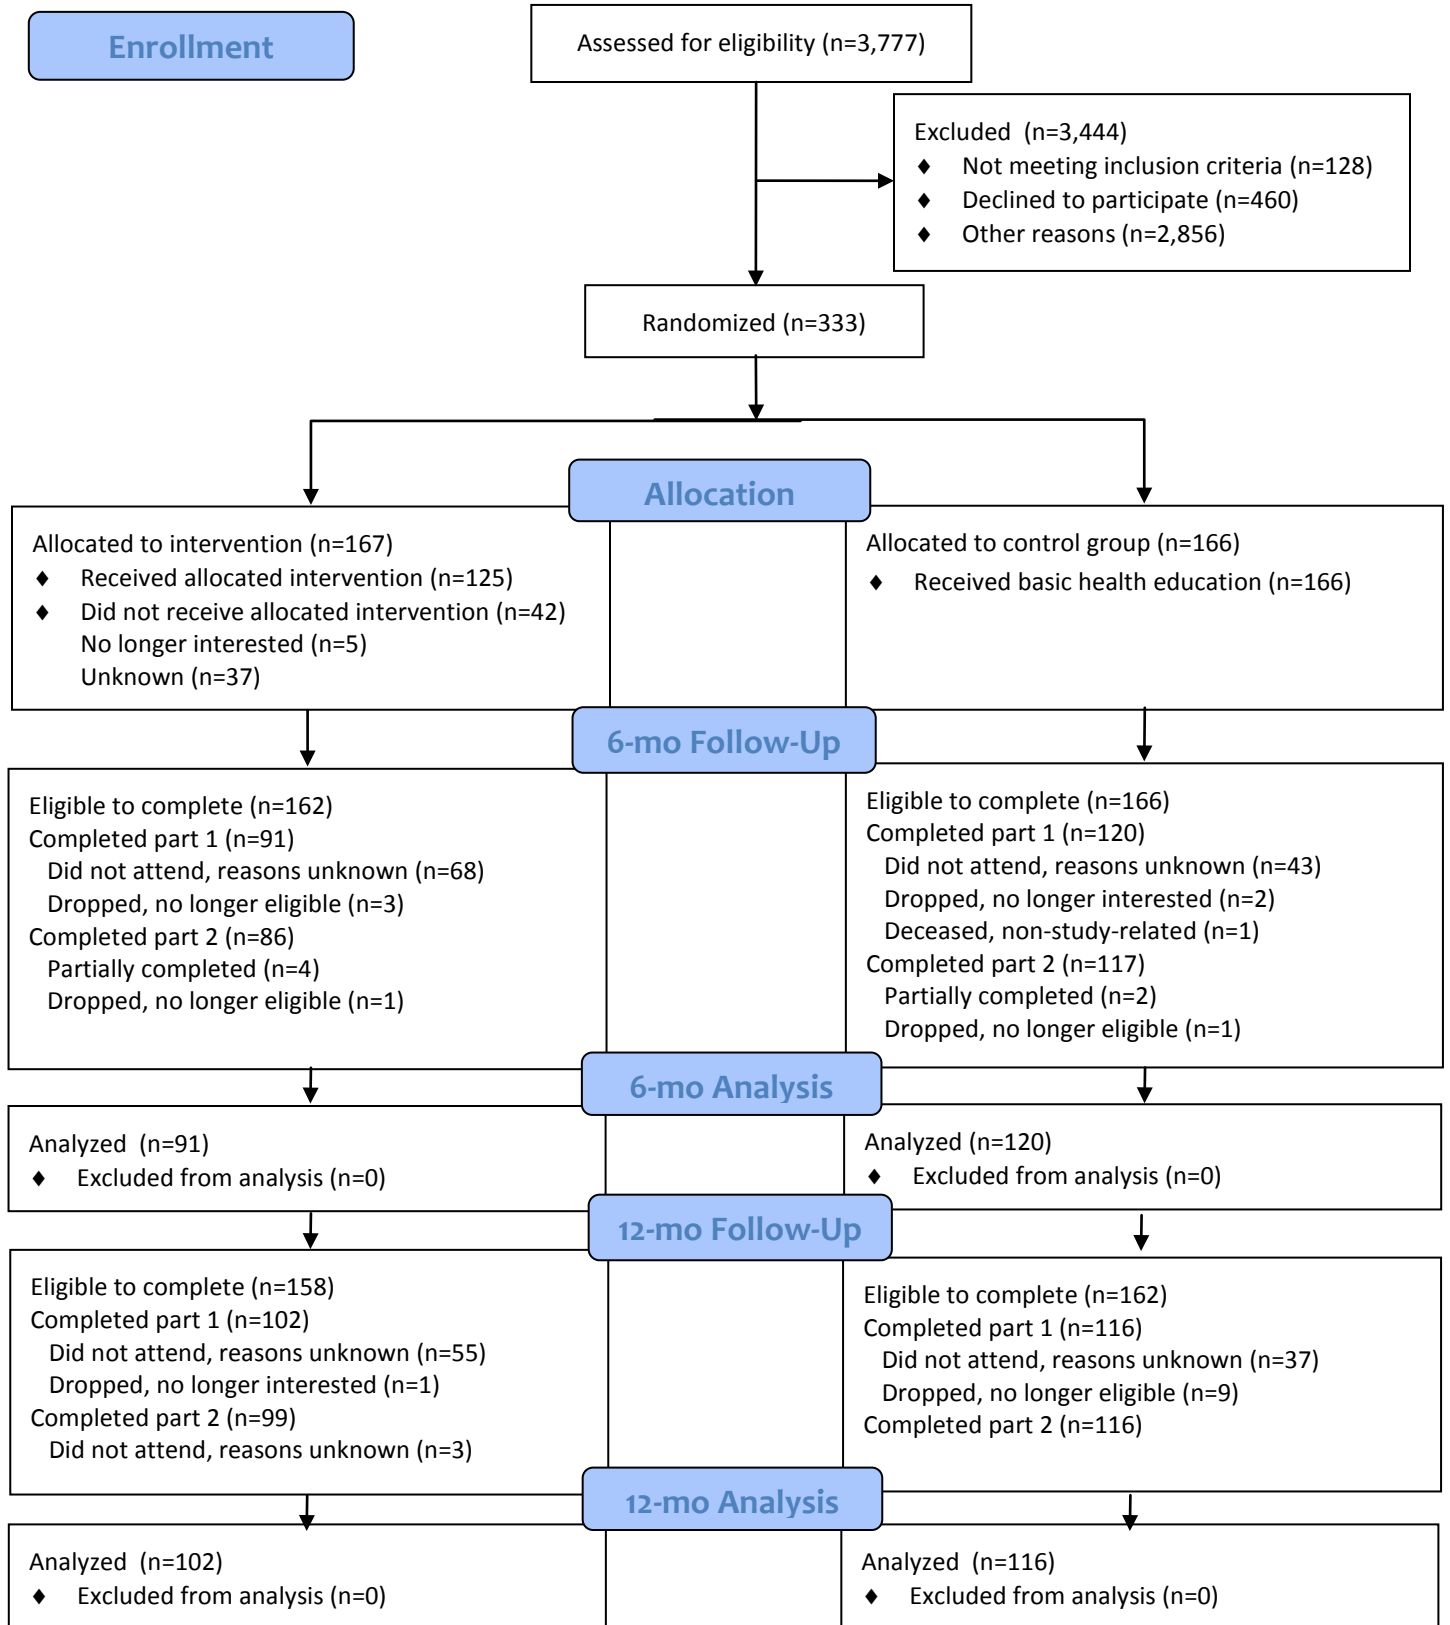

Supplement: Data_Sheet_1.PDF [file Data_Sheet_1.PDF]
